# Supplementary material for: Ep400 deficiency in Schwann cells causes persistent expression of early developmental regulators and peripheral neuropathy
Source: PubMed Central journal article supplement (PMC6541636; doi:10.1038/s41467-019-10287-w), 2019-05-29
Supplement: 41467_2019_10287_MOESM1_ESM.pdf [file 41467_2019_10287_MOESM1_ESM.pdf]

# Supplementary Information

for

Ep400 deficiency in Schwann cells causes persistent expression of  
early developmental regulators and peripheral neuropathy

by

Franziska Fröb et al.

## SUPPLEMENTARY FIGURES

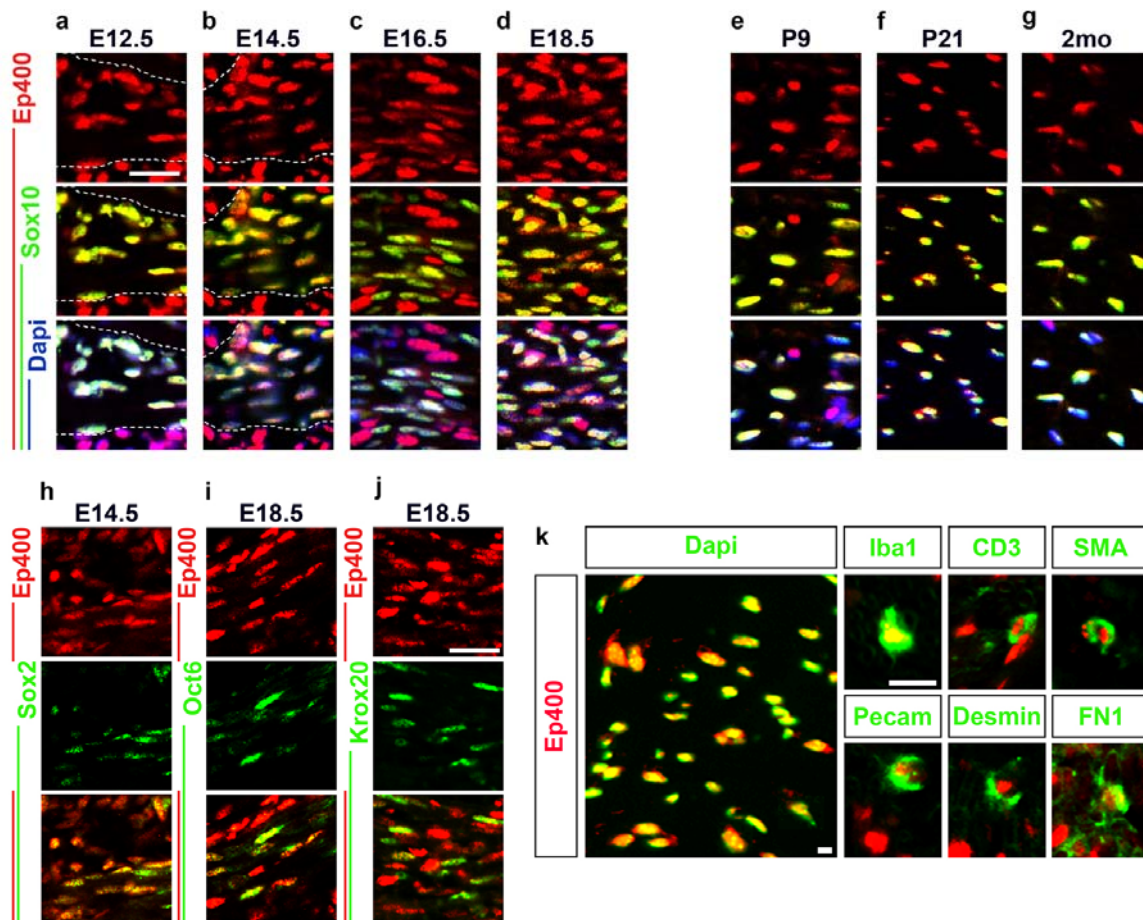

**Supplementary Figure 1: Ep400 expression in Schwann cells.** (a-g) Localization of Ep400 (red) in Sox10-labeled (green) Schwann cells (SCs) by immunofluorescence studies on spinal nerve (a-d) and sciatic nerve (e-g) sections at E12.5 (a), E14.5 (b), E16.5 (c), E18.5 (d), P9 (e), P21 (f) and 2 months (2mo, g) of age. Nuclei were counterstained with DAPI (blue). (h-j) Co-localization of Ep400 (red) with the stage-specific SC markers Sox2 (h), Oct6 (i) and Krox20 (j) (all in green) by immunohistochemistry on spinal nerve sections at E14.5 (h), and E18.5 (i,j). (k) Localization of Ep400 (red) in other cell types of the sciatic nerve at P9 such as Iba1-positive macrophages, CD3-positive T lymphocytes,  $\alpha$ -Smooth muscle actin (Sma) positive perivascular smooth muscle cells, Pecam-positive endothelial cells, Desmin-positive pericytes and fibronectin (FN1) expressing fibroblasts. Cell-type specific markers and nuclear DAPI stain are in green. Scale bars: 25 $\mu$ m (a,j), 10 $\mu$ m (k).

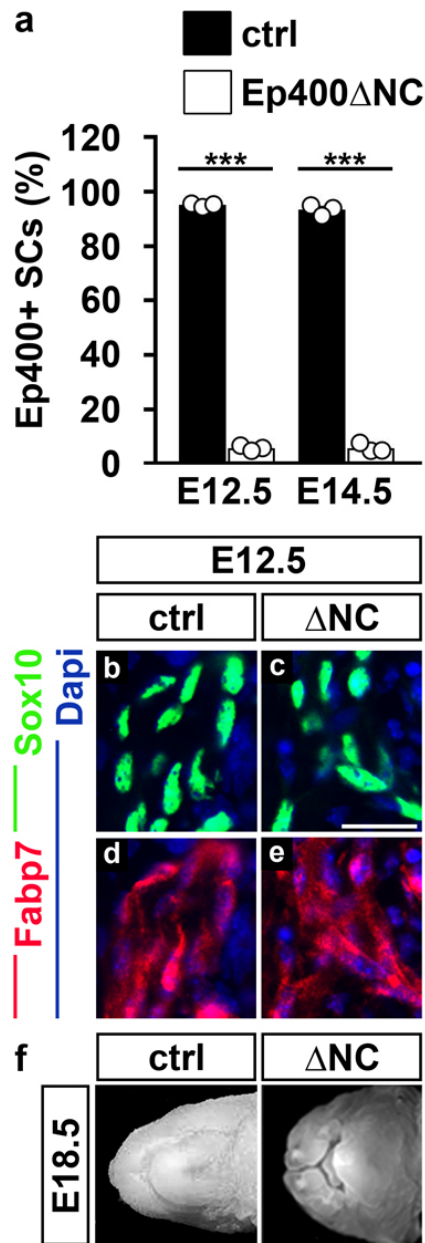

**Supplementary Figure 2: Early neural-crest specific deletion of Ep400.** (a) Ep400 deletion in SC precursors along spinal nerves of *Ep400 $\Delta$ NC* mice at E12.5 and E14.5 as determined by Ep400 immunohistochemistry relative to age-matched controls. SCs (SC) were identified by Sox10 staining (n = 3; mean values  $\pm$  SEM). Statistical significance was determined by unpaired two-tailed Student's t-test (\*\*\*,  $P \leq 0.001$ ). (b-e) Presence of SC precursors along spinal nerves of control and *Ep400 $\Delta$ NC* mice at E12.5 as determined by immunohistochemical detection of Sox10 (green) (b,c) and Fabp7 (red) (d,e). Nuclei were counterstained with DAPI (blue). Scale bars: 25 $\mu$ m (c). (f) Ventral view of head from control and *Ep400 $\Delta$ NC* embryos at E18.5 showing orofacial clefting in the mutant. Exact values are listed in Suppl. Table 10 and source data are provided as a Source Data file.

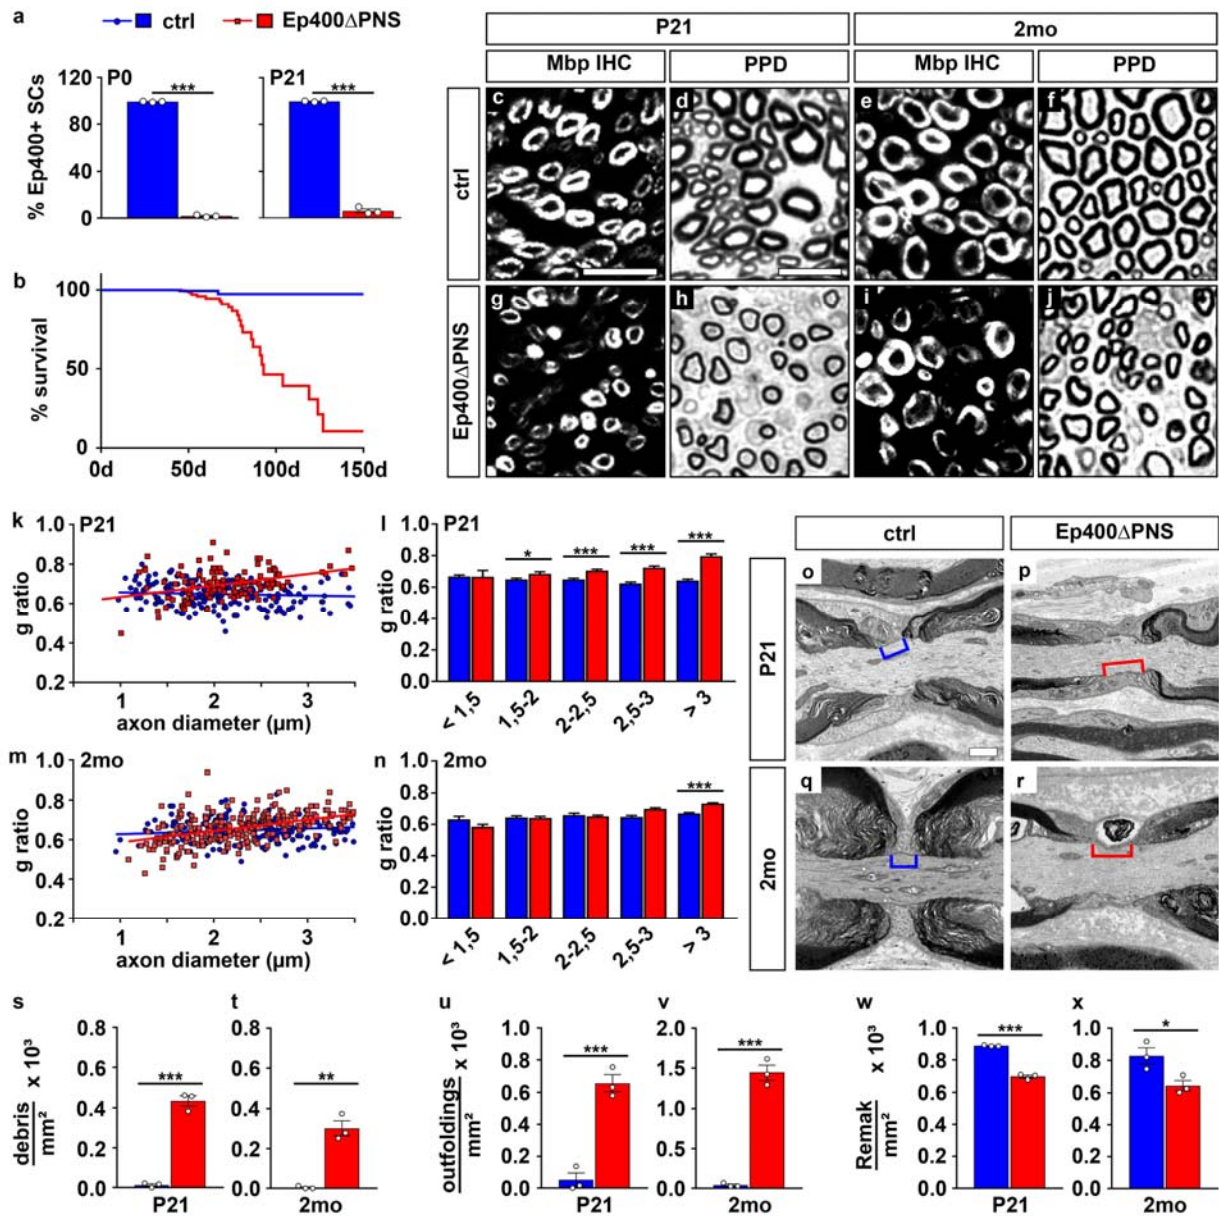

**Supplementary Figure 3: Myelination defects in *Ep400* $\Delta$ PNS mice.** (a) Ep400 deletion in sciatic nerve SCs of *Ep400* $\Delta$ PNS mice (red bars) at P0 and P21 as determined by Ep400 immunohistochemistry relative to age-matched controls (blue bars). SCs were identified by Sox10 staining ( $n = 3$ ; mean values  $\pm$  SEM). (b) Survival curve of control (blue line) and *Ep400* $\Delta$ PNS (red line) mice during the first 5 months of life. (c-j) Myelin structures visualized by Mbp immunohistochemistry (c,e,g,i) and PPD staining (d,f,h,j) on transverse sciatic nerve sections of control (c-f) and *Ep400* $\Delta$ PNS (g-j) mice at P21 (c,d,g,h) and 2mo (e,f,i,j). (k-n) Determination of single g ratios (scatter plots in k,m) and g ratio in relation to axon size after binning of axons according to their diameter (l,n) from ultrathin sciatic nerve sections of control (blue) and *Ep400* $\Delta$ PNS (red) mice at P21 (k,l) and 2 months (2mo) of age (m,n) using  $n = 100$ -300 axons for each age (mean g ratios  $\pm$  SEM). (o-r) Appearance of node and paranode on ultrathin longitudinal sections of sciatic nerves from control (o,q) and *Ep400* $\Delta$ PNS (p,r) mice at P21 (o,p) and 2 months (q,r) of age. (s-x) Quantification of myelin

debris (s,t), myelin outfoldings (u,v) and Remak bundles (w,x) on ultrathin transverse sections of sciatic nerves from control (blue) and *Ep400 $\Delta$ PN5* (red) mice at P21 (s,u,w) and 2 months (t,v,x). Statistical significance was determined by unpaired, two-tailed Student's t-test (\*,  $P \leq 0.05$ ; \*\*,  $P \leq 0.01$ ; \*\*\*,  $P \leq 0.001$ ). Scale bars: 25 $\mu$ m (c), 1 $\mu$ m (o). Exact values are listed in Suppl. Table 1,9,10 and source data are provided as a Source Data file.

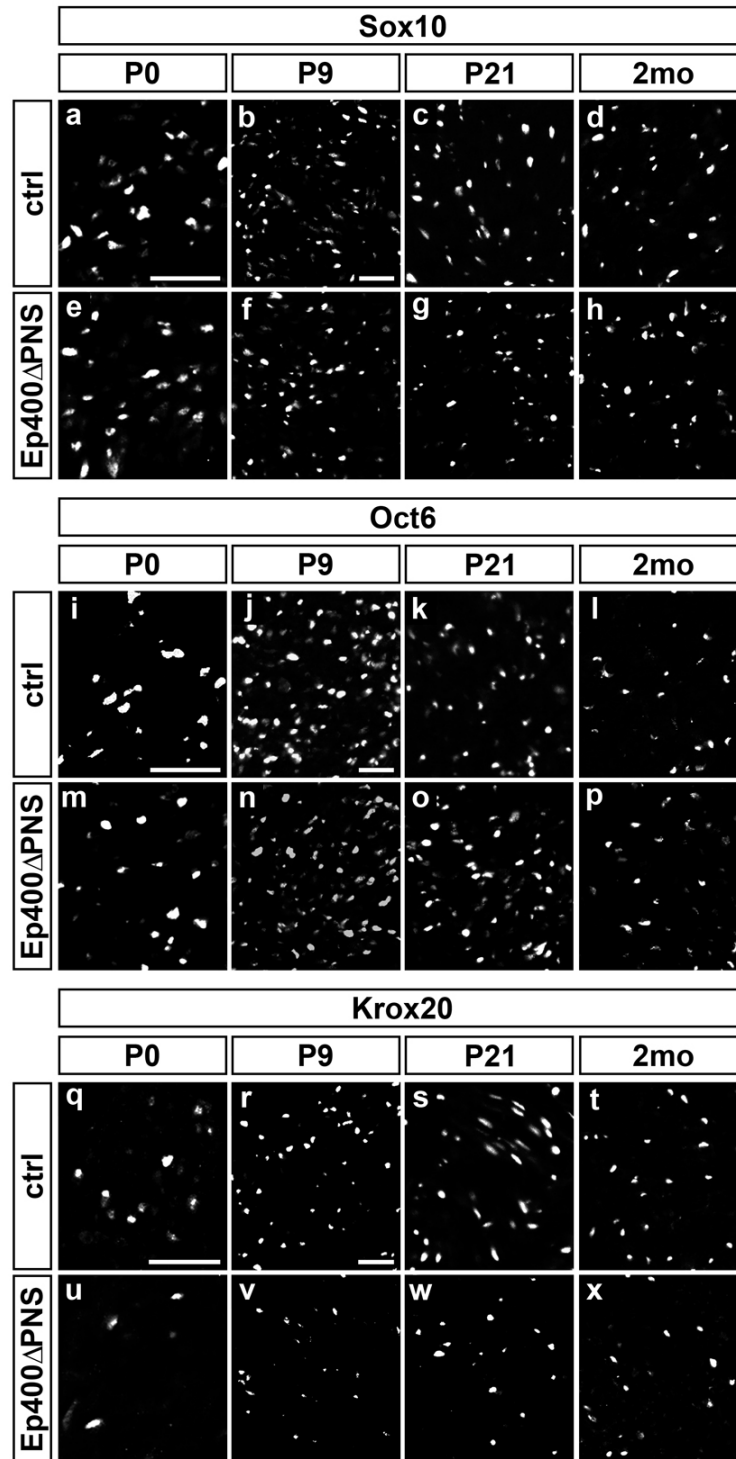

**Supplementary Figure 4: Expression of Schwann cell regulatory factors in *Ep400 $\Delta$ PNS* mice.** (a-x) Immunohistochemical stainings of sciatic nerve sections of control (a-d,i-l,q-t) and *Ep400 $\Delta$ PNS* (e-h,m-p,u-x) mice at P0 (a,e,i,m,q,u), P9 (b,f,j,n,r,v), P21 (c,g,k,o,s,w) and 2months (2mo) (d,h,l,p,t,x) with antibodies directed against Sox10 (a-h), Oct6 (i-p) and Krox20 (q-x). Scale bars: 25 $\mu$ m.

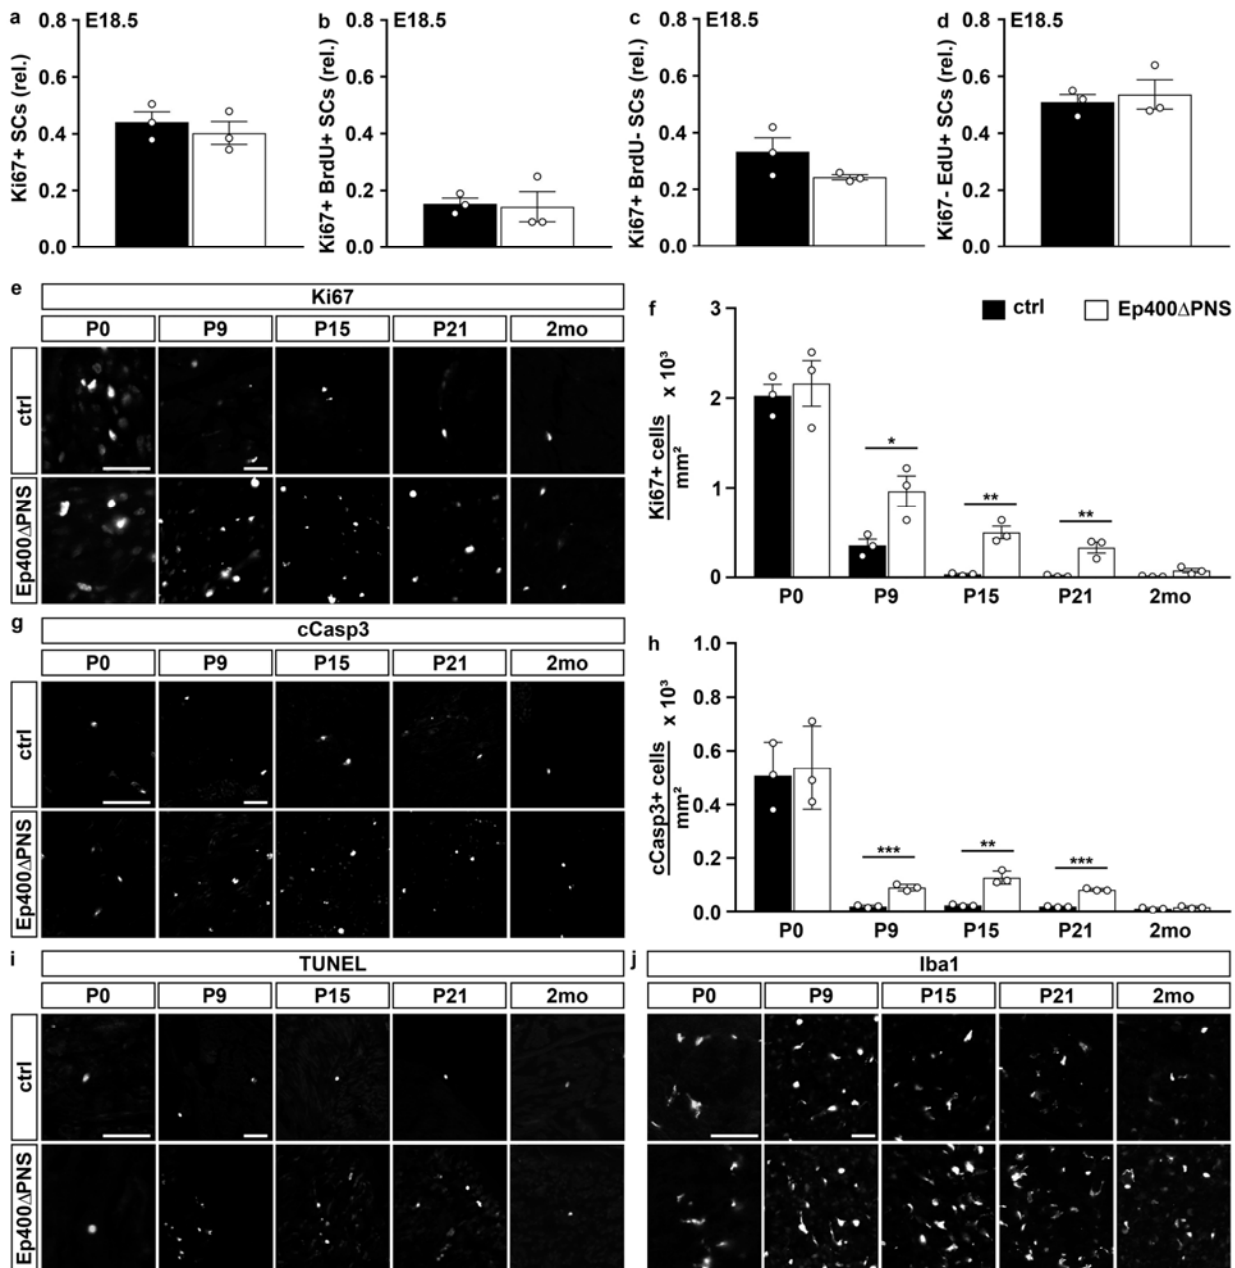

**Supplementary Figure 5: General and cell type-specific changes of proliferation, apoptosis and inflammation in sciatic nerves of in *Ep400 $\Delta$ PNS* mice.** (a-d) Quantification of SC proliferation at E18.5 after treating pregnant mice at E17.5 with EdU and 1 h before harvesting the embryos by caesarean section with BrdU. The fraction of SCs in cell cycle was determined as the fraction of Ki67-positive SCs (a), the actively dividing fraction as the fraction of Ki67- and BrdU-positive SCs (b), the non-dividing fraction as the percentage of Ki67-positive, but BrdU-negative SCs (c), and the fraction that had exited the cell cycle during the last 24h as the percentage of Ki67-negative SCs among the ones labelled with EdU one day prior to analysis (d) in spinal nerves of control (black bars) and *Ep400 $\Delta$ PNS* (white bars) embryos (n = 3 each, mean values  $\pm$  SEM). (e-j) Immunohistochemical stainings with antibodies directed against Ki67 (e), cleaved Caspase 3 (g) and Iba1 (j) or TUNEL (i) of sciatic nerve sections of control and *Ep400 $\Delta$ PNS* mice at P0, P9, P15, P21 and 2 months

(2mo) and corresponding quantifications of Ki67-positive (f) and cleaved Caspase 3-positive (h) cells (n = 3; mean values  $\pm$  SEM). Scale bars: 25 $\mu$ m. Statistical significance was determined by two-tailed Student's t-test (\*, P  $\leq$ 0.05; \*\*, P  $\leq$ 0.01; \*\*\*, P  $\leq$ 0.001). Exact values are listed in Suppl. Table 5,11 and source data are provided as a Source Data file.



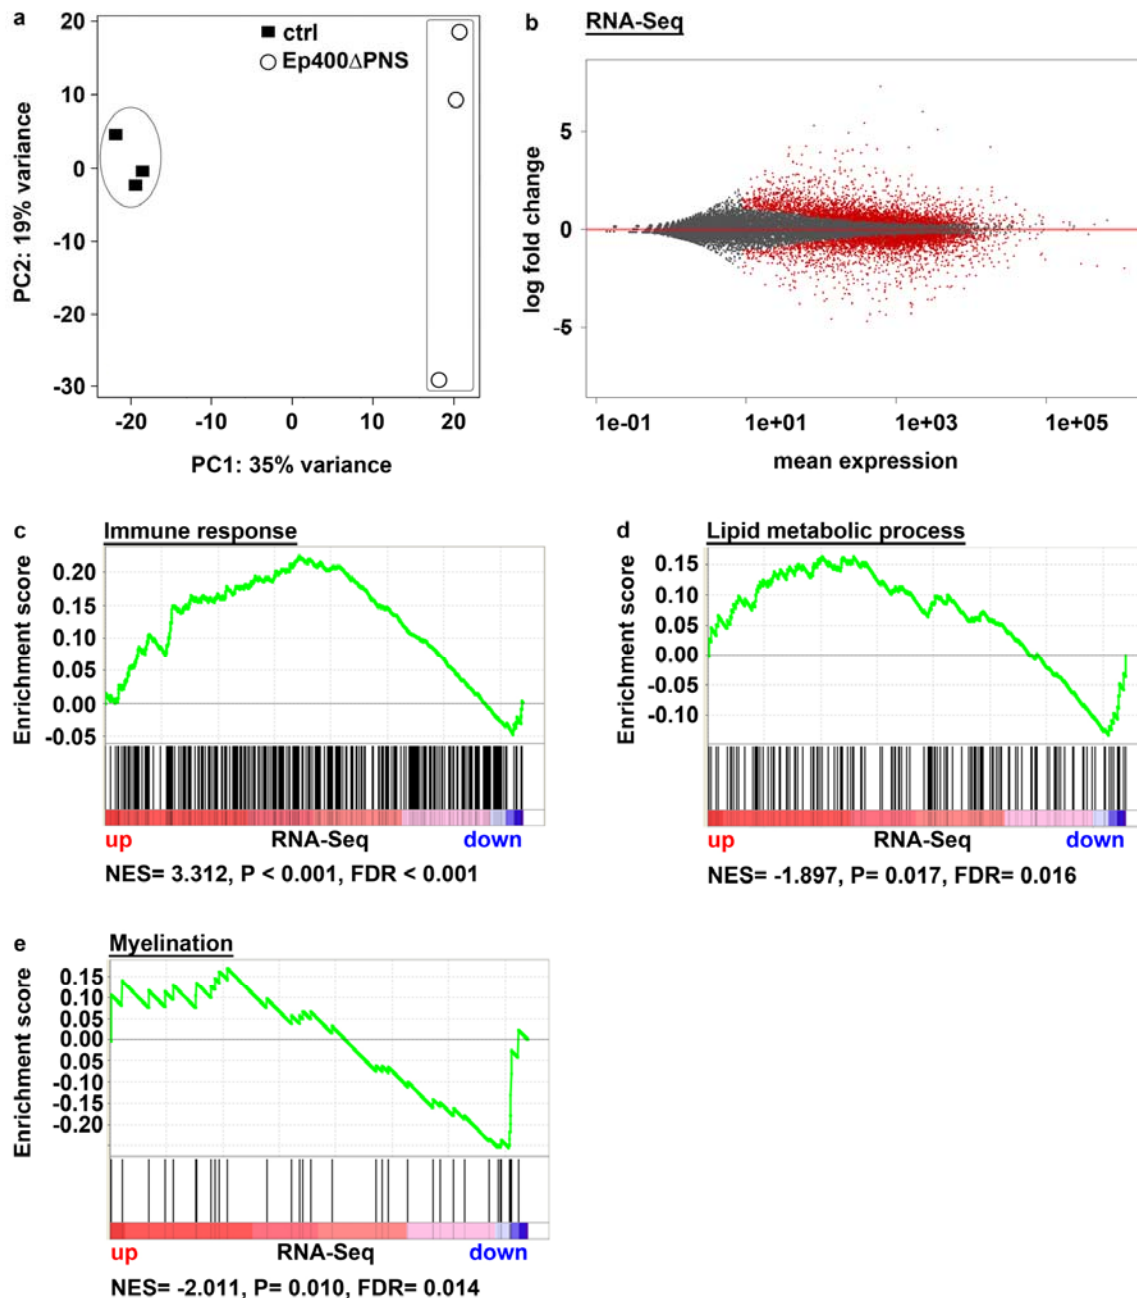

**Supplementary Figure 6: RNA-Seq data from sciatic nerves of control and *Ep400* $\Delta$ PNS mice.** (a) Principal component analysis blot of RNA-Seq samples from sciatic nerves of control (black squares) and *Ep400* $\Delta$ PNS (white circles) mice at P9. (b) MA plot depicting the overall gene expression changes (red dots) in sciatic nerves of *Ep400* $\Delta$ PNS mice relative to controls. (c-e) Gene set enrichment blots from GSEA analysis of RNA-Seq data with the following gene sets: immune response (c), lipid metabolic process (d) and myelination (e). Normalized enrichment score (NES), p value and false discovery rate (FDR) are listed at the bottom of each blot.

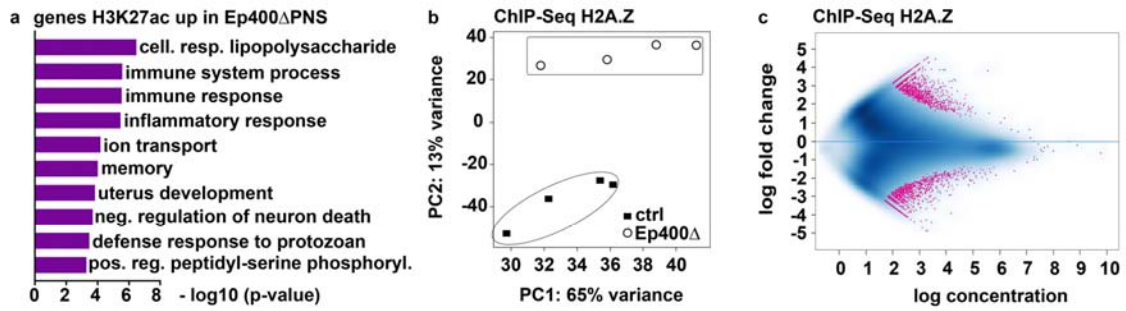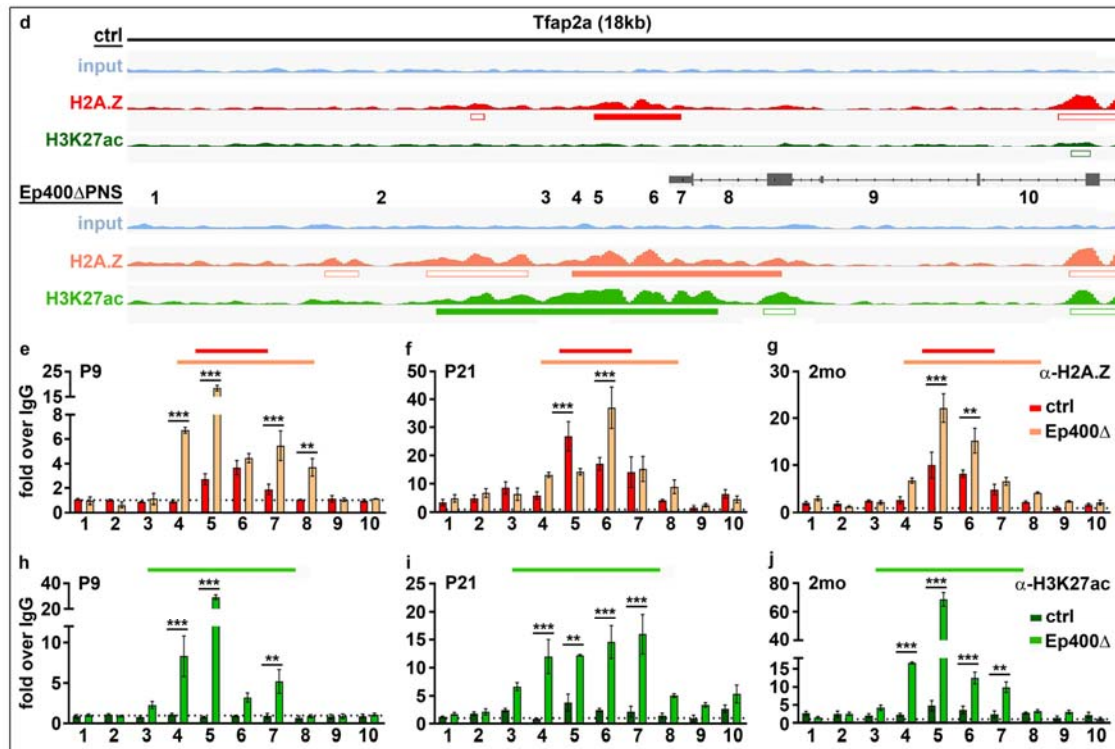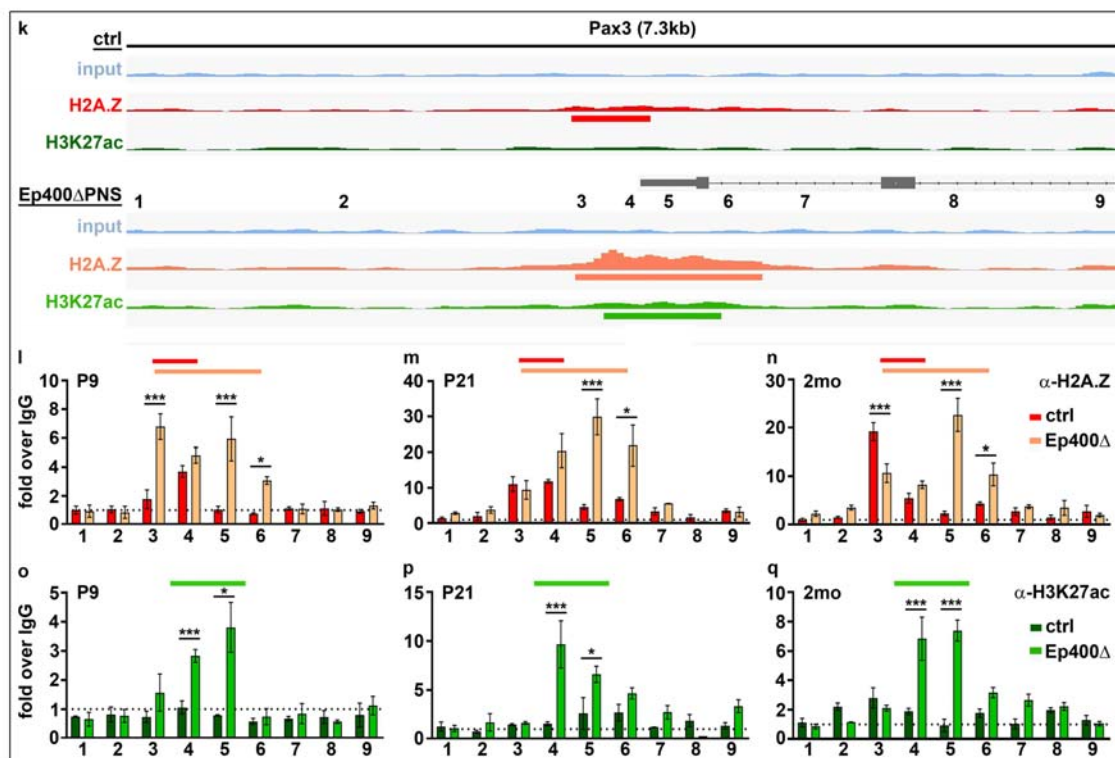

**Supplementary Figure 7: ChIP data from sciatic nerves of control and *Ep400ΔPNS* mice.** (a) GO analysis (DAVID) for biological processes enriched among genes that gained promoter-associated H3K27ac in *Ep400ΔPNS* nerves. Processes are sorted by statistical significance. (b) Principal component analysis blot of ChIP-Seq from H2A.Z samples from sciatic nerves of control (black squares) and *Ep400ΔPNS* (white circles) mice at P9. (c) MA plot depicting the overall differences (red dots) in affinity to binding sites in sciatic nerves of *Ep400ΔPNS* mice relative to controls. (d-q) Genomic distribution of H2A.Z (d-g,k-n) and H3K27ac (d,h-j,k,o-q) in chromatin from sciatic nerves of control (red, dark green) and *Ep400ΔPNS* (orange, light green) mice in the *Tfap2a* (d-j) and *Pax3* (k-q) genomic loci at P9 (d,e,h,k,l,o), P21 (f,i,m,p) and 2 months (g,j,n,q). Data are from ChIP-Seq (d,k) and ChIP-qPCR (e-j,l-q) experiments. ChIP-Seq data are presented as tracks and are expanded relative to those shown in Fig. 4f,g. TSS-associated peaks for H2A.Z are marked by red (control) or orange (*Ep400ΔPNS*) lines below the tracks, those for H3K27ac by dark (control) or light (*Ep400ΔPNS*) green lines. Other peaks are marked by lines with coloured rim. For ChIP-qPCR experiments, several regions distributed throughout the *Tfap2a* and *Pax3* loci (for position, see numbers in d,k) were analyzed by quantitative PCR for enrichment in chromatin from sciatic nerves of control (red and dark green bars) and *Ep400ΔPNS* (orange and light green bars) mice after precipitation with antibodies directed against H2A.Z and H3K27ac compared to IgG control (arbitrarily set to 1, dotted line). ChIP-qPCR data are presented as mean values  $\pm$  SEM (n = 3). The relative position of TSS-associated peaks from ChIP-Seq studies to the regions analyzed in ChIP-qPCR is indicated by coloured horizontal lines at the top of each ChIP-qPCR panel. Statistical significance was determined by two-tailed Student's t-test (\*,  $P \leq 0.05$ ; \*\*,  $P \leq 0.01$ ; \*\*\*,  $P \leq 0.001$ ). Exact values and primer sequences for ChIP-qPCR experiments are listed in Suppl. Tables 12,13 and source data are provided as a Source Data file.

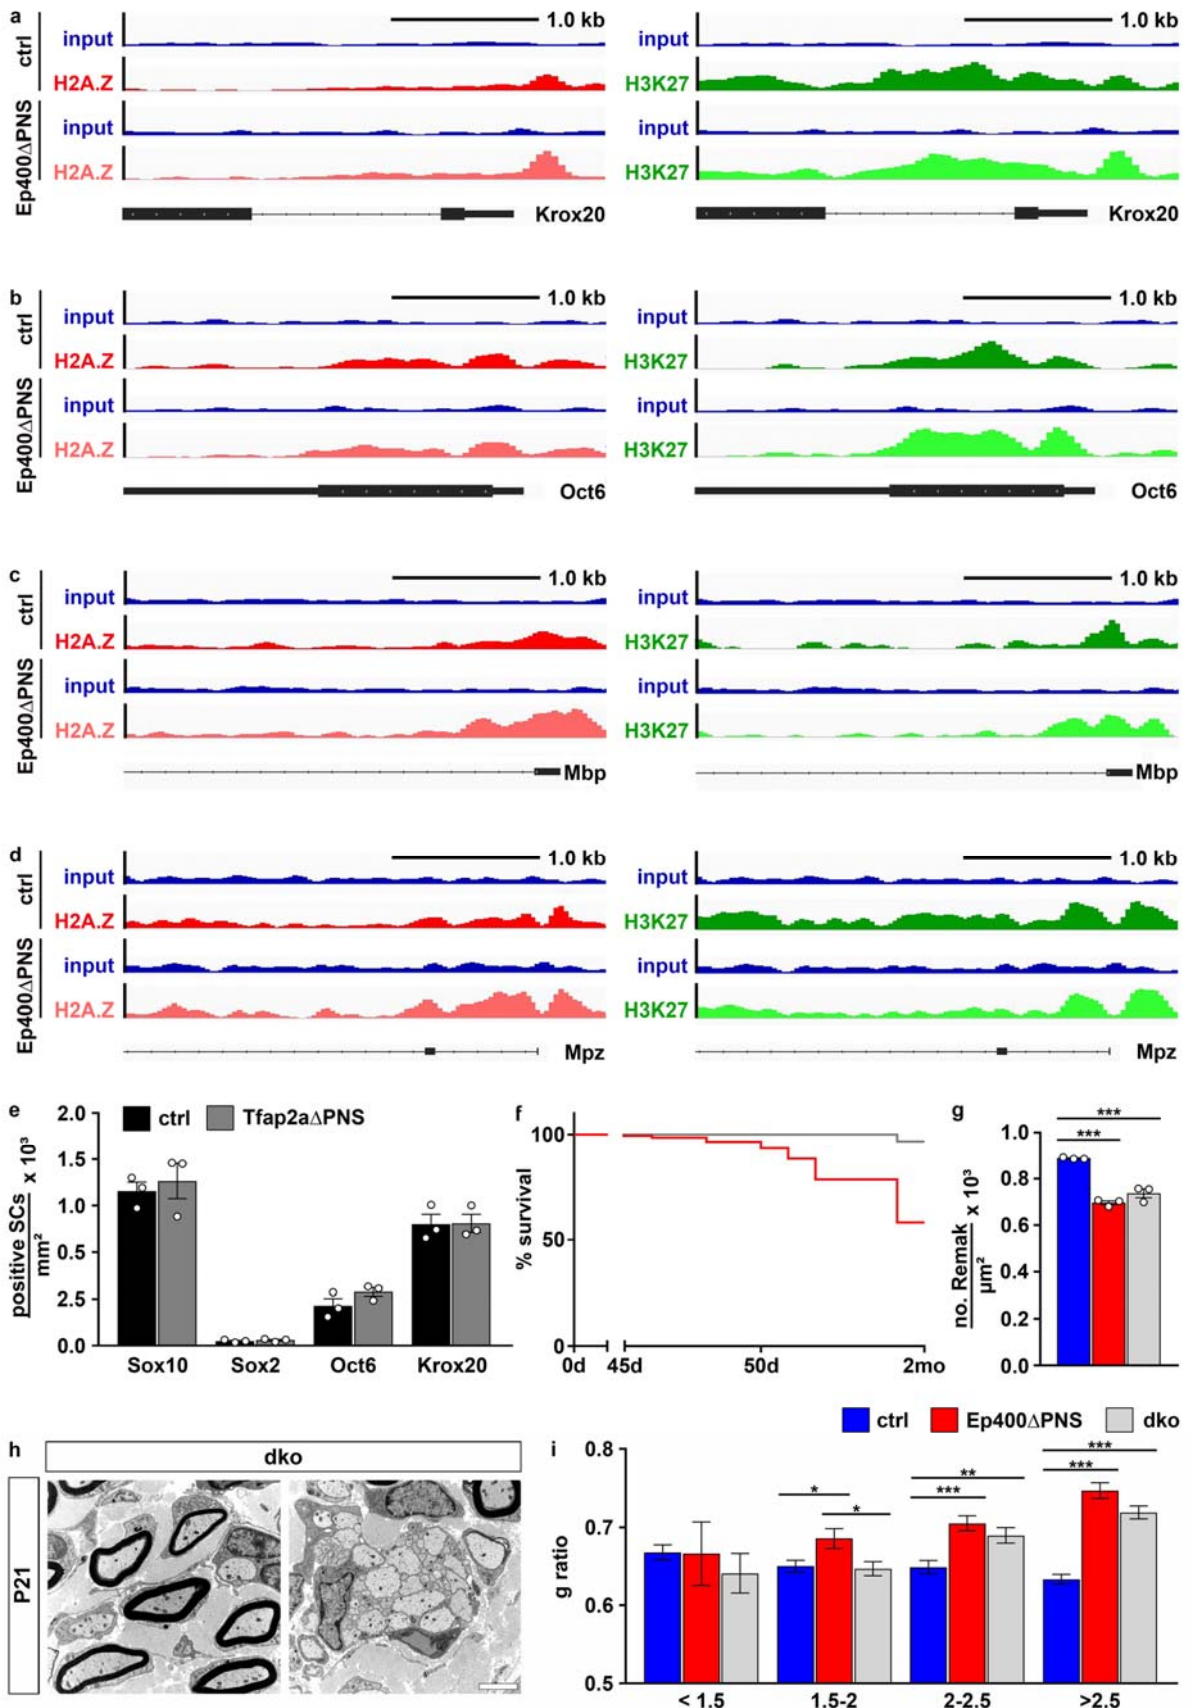

**Supplementary Figure 8: Characterization of chromatin at select promoters in *Ep400ΔPNS* mice and Schwann cell phenotype in dko mice.** (a-d) Tracks from H2A.Z (left) and H3K27ac (right) ChIP-Seq experiments for *Krox20* (a), *Oct6* (b), *Mbp* (c) and *Mpz* (d) performed on chromatin from sciatic nerves of control (red and dark green) and *Ep400ΔPNS* (orange and light green) mice at P9. Shown are H2A.Z precipitates, H3K27ac precipitates and input (blue) for both genotypes. Differential peaks were not detected and would be marked by colored lines below the corresponding tracks. (e) Comparison of the total SC number and the number of Sox2-, Oct6-, and Krox20- positive SCs in sciatic nerve sections of control (black bars) and *Tfap2aΔPNS* (dark grey bars) mice at P21 (n = 3; mean values ± SEM). (f) Survival curve of *Ep400ΔPNS* (red line) and dko (light grey line) mice during the first 2 months of life. (g) Quantification of Remak bundles on ultrathin transverse sections of sciatic nerves from control (blue bars), *Ep400ΔPNS* (red bars) and dko (light grey bars) mice at P21 (n = 3; mean values ± SEM). Values for control and *Ep400ΔPNS* mice are those shown in Suppl. Fig. 3w. (h) Representative electron microscopic pictures of sciatic nerve sections from dko mice at P21. For comparison with control and *Ep400ΔPNS* mice, see Fig. 1i-l. Scale bar: 2.5μm. (i) Determination of g ratio in relation to axon size after binning of axons according to their diameter from ultrathin sciatic nerve sections of control (blue bars), *Ep400ΔPNS* (red bars) and dko (light grey bars) mice at P21 (n = 100-200 axons). Values for control and *Ep400ΔPNS* mice are those shown in Suppl. Fig. 3l. Statistical significance was determined by two-tailed Student's t-test (e) or ANOVA (g,i) (\*, P ≤0.05; \*\*, P ≤0.01; \*\*\*, P ≤0.001). Exact values are listed in Suppl. Tables 1,5,9 and source data are provided as a Source Data file.

## SUPPLEMENTARY TABLES

**Supplementary Table 1:** G ratio of myelin sheaths in sciatic nerves of control and mutant mice

| Age            | Genotype        | Mean value<br>± SEM | Figure               |
|----------------|-----------------|---------------------|----------------------|
| P21            | control         | 0.65 ± 0.01         | Figs. 1q & 5n        |
|                | <1.5µm Ø axons  | 0.67 ± 0.01         | Suppl. Figs. 3l & 8i |
|                | 1.5-2µm Ø axons | 0.65 ± 0.01         | Suppl. Figs. 3l & 8i |
|                | 2-2.5µm Ø axons | 0.65 ± 0.01         | Suppl. Figs. 3l & 8i |
|                | 2.5-3µm Ø axons | 0.62 ± 0.01         | Suppl. Figs. 3l & 8i |
|                | >3µm Ø axons    | 0.64 ± 0.01         | Suppl. Figs. 3l      |
|                | >2.5µm Ø axons  | 0.63 ± 0.01         | Suppl. Figs. 8i      |
|                | Ep400ΔPNS       | 0.70 ± 0.01         | Figs. 1q & 5n        |
|                | <1.5µm Ø axons  | 0.67 ± 0.04         | Suppl. Figs. 3l & 8i |
|                | 1.5-2µm Ø axons | 0.69 ± 0.01         | Suppl. Figs. 3l & 8i |
|                | 2-2.5µm Ø axons | 0.71 ± 0.01         | Suppl. Figs. 3l & 8i |
|                | 2.5-3µm Ø axons | 0.72 ± 0.01         | Suppl. Figs. 3l & 8i |
|                | >3µm Ø axons    | 0.80 ± 0.01         | Suppl. Figs. 3l      |
|                | >2.5µm Ø axons  | 0.75 ± 0.01         | Suppl. Figs. 8i      |
|                | dko             | 0.67 ± 0.01         | Fig. 5n              |
|                | <1.5µm Ø axons  | 0.64 ± 0.03         | Suppl. Fig. 8i       |
|                | 1.5-2µm Ø axons | 0.65 ± 0.01         | Suppl. Fig. 8i       |
|                | 2-2.5µm Ø axons | 0.69 ± 0.01         | Suppl. Fig. 8i       |
| >2.5µm Ø axons | 0.72 ± 0.01     | Suppl. Fig. 8i      |                      |
| 2 months       | control         | 0.66 ± 0.01         | Fig. 1u              |
|                | <1.5µm Ø axons  | 0.63 ± 0.02         | Suppl. Fig. 3n       |
|                | 1.5-2µm Ø axons | 0.64 ± 0.01         | Suppl. Fig. 3n       |
|                | 2-2.5µm Ø axons | 0.66 ± 0.01         | Suppl. Fig. 3n       |
|                | 2.5-3µm Ø axons | 0.65 ± 0.01         | Suppl. Fig. 3n       |
|                | >3µm Ø axons    | 0.67 ± 0.01         | Suppl. Fig. 3n       |
|                | Ep400ΔPNS       | 0.67 ± 0.01         | Fig. 1u              |
|                | <1.5µm Ø axons  | 0.58 ± 0.02         | Suppl. Fig. 3n       |
|                | 1.5-2µm Ø axons | 0.64 ± 0.01         | Suppl. Fig. 3n       |
|                | 2-2.5µm Ø axons | 0.65 ± 0.01         | Suppl. Fig. 3n       |
|                | 2.5-3µm Ø axons | 0.70 ± 0.01         | Suppl. Fig. 3n       |
|                | >3µm Ø axons    | 0.73 ± 0.01         | Suppl. Fig. 3n       |



**Supplementary Table 2:** Percentage of myelinated large caliber axons in sciatic nerves of control and mutant mice

| Age      | Genotype  | Mean value<br>± SEM | Figure  |
|----------|-----------|---------------------|---------|
| P21      | control   | 100 ± 0.00 %        | Fig. 1r |
|          | Ep400ΔPNS | 74.67 ± 2.33%       | Fig. 1r |
| 2 months | control   | 100 ± 0.00 %        | Fig. 1v |
|          | Ep400ΔPNS | 97.00 ± 1.00%       | Fig. 1v |

**Supplementary Table 3:** Relative length distribution of internodes in sciatic nerves of control and mutant mice at P21

| Genotype  | Internodal length | Mean value<br>± SEM | Figure  |
|-----------|-------------------|---------------------|---------|
| control   | 0-50 μm           | 9.70 ± 4.85         | Fig. 2a |
|           | 50-150 μm         | 58.78 ± 11.30       | Fig. 2a |
|           | 150-200μm         | 27.82 ± 4.72        | Fig. 2a |
|           | 200-250μm         | 3.70 ± 3.70         | Fig. 2a |
| Ep400ΔPNS | 0-50 μm           | 54.39 ± 8.15        | Fig. 2a |
|           | 50-150 μm         | 48.82 ± 9.20        | Fig. 2a |
|           | 150-200μm         | 0.00 ± 0.00         | Fig. 2a |
|           | 200-250μm         | 0.00 ± 0.00         | Fig. 2a |

**Supplementary Table 4:** Length of nodes and paranodes in sciatic nerves of control and mutant mice at P21

| Structure | Genotype  | Mean value<br>± SEM | Figure        |
|-----------|-----------|---------------------|---------------|
| node      | control   | 1.00 ± 0.02μm       | Figs. 2c & 5q |
|           | Ep400ΔPNS | 1.34 ± 0.03μm       | Figs. 2c & 5q |
|           | dko       | 1.32 ± 0.08μm       | Fig. 5q       |
| paranode  | control   | 4.28 ± 0.16μm       | Figs. 2d & 5r |
|           | Ep400ΔPNS | 3.46 ± 0.13μm       | Figs. 2d & 5r |
|           | dko       | 3.66 ± 0.10μm       | Fig. 5r       |

**Supplementary Table 5:** Number of marker-positive cells per defined area in sciatic nerves of control and mutant mice

| Marker | Age      | Genotype   | Mean value<br>± SEM | Figure                  |
|--------|----------|------------|---------------------|-------------------------|
| Sox10  | P0       | control    | 8237 ± 440          | Fig. 2e                 |
|        |          | control    | 7800 ± 64           | Fig. 5a                 |
|        |          | Ep400ΔPNS  | 7630 ± 658          | Fig. 2e                 |
|        |          | Ep400ΔPNS  | 7950 ± 330          | Fig. 5a                 |
|        |          | dko        | 7943 ± 170          | Fig. 5a                 |
|        | P9       | control    | 4340 ± 456          | Fig. 2e                 |
|        |          | control    | 3903 ± 47           | Fig. 5a                 |
|        |          | Ep400ΔPNS  | 4497 ± 739          | Fig. 2e                 |
|        |          | Ep400ΔPNS  | 4027 ± 15           | Fig. 5a                 |
|        |          | dko        | 4043 ± 232          | Fig. 5a                 |
|        | P21      | control    | 1777 ± 100          | Fig. 2e                 |
|        |          | control    | 1656 ± 96           | Fig. 5a, Suppl. Fig. 8e |
|        |          | Ep400ΔPNS  | 1863 ± 103          | Fig. 2e                 |
|        |          | Ep400ΔPNS  | 1768 ± 294          | Fig. 5a                 |
|        |          | Tfap2aΔPNS | 1766 ± 191          | Suppl. Fig. 8e          |
|        |          | dko        | 1588 ± 120          | Fig. 5a                 |
|        | 2 months | control    | 847 ± 98            | Fig. 2e                 |
|        |          | control    | 957 ± 19            | Fig. 5a                 |
|        |          | Ep400ΔPNS  | 850 ± 148           | Fig. 2e                 |
|        |          | Ep400ΔPNS  | 941 ± 16            | Fig. 5a                 |
| dko    |          | 944 ± 39   | Fig. 5a             |                         |
| Oct6   | P0       | control    | 5677 ± 386          | Fig. 2f                 |
|        |          | control    | 5607 ± 124          | Fig. 5c                 |
|        |          | Ep400ΔPNS  | 5307 ± 94           | Fig. 2f                 |
|        |          | Ep400ΔPNS  | 5493 ± 50           | Fig. 5c                 |
|        |          | dko        | 5567 ± 284          | Fig. 5c                 |
|        | P9       | control    | 3317 ± 147          | Fig. 2f                 |
|        |          | control    | 2891 ± 150          | Fig. 5c                 |
|        |          | Ep400ΔPNS  | 2857 ± 391          | Fig. 2f                 |
|        |          | Ep400ΔPNS  | 2747 ± 136          | Fig. 5c                 |
|        |          | dko        | 2780 ± 5            | Fig. 5c                 |
|        | P21      | control    | 710 ± 150           | Fig. 2f                 |
|        |          | control    | 428 ± 76            | Fig. 5c, Suppl. Fig.8e  |
|        |          | Ep400ΔPNS  | 1423 ± 163          | Fig. 2f                 |
|        |          | Ep400ΔPNS  | 1208 ± 143          | Fig. 5c                 |
|        |          | Tfap2aΔPNS | 577 ± 45            | Suppl. Fig.8e           |



|        |          |            |            |                        |         |
|--------|----------|------------|------------|------------------------|---------|
|        |          | dko        | 879 ± 152  | Fig. 5c                |         |
|        | 2 months | control    | 310 ± 25   | Fig. 2f                |         |
|        |          | control    | 194 ± 6    | Fig. 5c                |         |
|        |          | Ep400ΔPNS  | 517 ± 99   | Fig. 2f                |         |
|        |          | Ep400ΔPNS  | 339 ± 31   | Fig. 5c                |         |
|        |          | dko        | 233 ± 8    | Fig. 5c                |         |
| Krox20 | P0       | control    | 2323 ± 277 | Fig. 2g                |         |
|        |          | control    | 2343 ± 63  | Fig. 5d                |         |
|        |          | Ep400ΔPNS  | 760 ± 284  | Fig. 2g                |         |
|        |          | Ep400ΔPNS  | 910 ± 26   | Fig. 5d                |         |
|        |          | dko        | 1577 ± 73  | Fig. 5d                |         |
|        | P9       | control    | 1630 ± 213 | Fig. 2g                |         |
|        |          | control    | 1608 ± 34  | Fig. 5d                |         |
|        |          | Ep400ΔPNS  | 480 ± 56   | Fig. 2g                |         |
|        |          | Ep400ΔPNS  | 527 ± 25   | Fig. 5d                |         |
|        |          | dko        | 1088 ± 64  | Fig. 5d                |         |
|        | P21      | control    | 1893 ± 42  | Fig. 2g                |         |
|        |          | control    | 1301 ± 107 | Fig. 5d, Suppl. Fig.8e |         |
|        |          | Ep400ΔPNS  | 903 ± 153  | Fig. 2g                |         |
|        |          | Ep400ΔPNS  | 791 ± 16   | Fig. 5d                |         |
|        |          | Tfap2aΔPNS | 1310 ± 97  | Suppl. Fig.8e          |         |
|        |          | dko        | 1142 ± 13  | Fig. 5d                |         |
|        | 2 months | control    | 880 ± 114  | Fig. 2g                |         |
|        |          | control    | 841 ± 39   | Fig. 5d                |         |
|        |          | Ep400ΔPNS  | 750 ± 95   | Fig. 2g                |         |
|        |          | Ep400ΔPNS  | 744 ± 36   | Fig. 5d                |         |
|        |          | dko        | 826 ± 9    | Fig. 5d                |         |
| Sox2   | P0       | control    | 2203 ± 227 | Fig. 5b                |         |
|        |          | Ep400ΔPNS  | 1577 ± 191 | Fig. 5b                |         |
|        |          | dko        | 2080 ± 391 | Fig. 5b                |         |
|        | P9       | control    | 65 ± 4     | Fig. 5b                |         |
|        |          | Ep400ΔPNS  | 349 ± 11   | Fig. 5b                |         |
|        |          | dko        | 211 ± 23   | Fig. 5b                |         |
|        | P21      | control    | 51 ± 8     | Fig. 5b, Suppl. Fig.8e |         |
|        |          | Ep400ΔPNS  | 347 ± 71   | Fig. 5b                |         |
|        |          | Tfap2aΔPNS | 61 ± 9     | Suppl. Fig. 8e         |         |
|        |          | dko        | 140 ± 21   | Fig. 5b                |         |
|        | 2 months | control    | 54 ± 3     | Fig. 5b                |         |
|        |          | Ep400ΔPNS  | 98 ± 1     | Fig. 5b                |         |
|        |          | dko        | 52 ± 3     | Fig. 5b                |         |
|        | Mbp      | P21        | control    | 57 ± 4                 | Fig. 5e |
|        |          |            | Tfap2aΔPNS | 53 ± 1                 | Fig. 5e |

|                           |          |           |            |         |
|---------------------------|----------|-----------|------------|---------|
|                           |          | Ep400ΔPNS | 27 ± 1     | Fig. 5e |
|                           |          | dko       | 43 ± 4     | Fig. 5e |
| Ki67 + Sox10              | P0       | control   | 1286 ± 116 | Fig. 2h |
|                           |          | control   | 1278 ± 90  | Fig. 5s |
|                           |          | Ep400ΔPNS | 1317 ± 122 | Fig. 2h |
|                           |          | Ep400ΔPNS | 1254 ± 88  | Fig. 5s |
|                           |          | dko       | 1292 ± 25  | Fig. 5s |
|                           | P9       | control   | 72 ± 4     | Fig. 2h |
|                           |          | control   | 62 ± 2     | Fig. 5s |
|                           |          | Ep400ΔPNS | 323 ± 69   | Fig. 2h |
|                           |          | Ep400ΔPNS | 335 ± 27   | Fig. 5s |
|                           |          | dko       | 191 ± 19   | Fig. 5s |
|                           | P15      | control   | 13 ± 6     | Fig. 2h |
|                           |          | Ep400ΔPNS | 184 ± 5    | Fig. 2h |
|                           | P21      | control   | 0 ± 0      | Fig. 2h |
|                           |          | control   | 18 ± 1     | Fig. 5s |
|                           |          | Ep400ΔPNS | 161 ± 8    | Fig. 2h |
|                           |          | Ep400ΔPNS | 341 ± 29   | Fig. 5s |
|                           |          | dko       | 154 ± 22   | Fig. 5s |
|                           | 2 months | control   | 0 ± 0      | Fig. 2h |
|                           |          | control   | 16 ± 5     | Fig. 5s |
|                           |          | Ep400ΔPNS | 56 ± 9     | Fig. 2h |
| Ep400ΔPNS                 |          | 78 ± 1    | Fig. 5s    |         |
| dko                       |          | 25 ± 6    | Fig. 5s    |         |
| Cleaved caspase 3 + Sox10 | P0       | control   | 234 ± 21   | Fig. 2i |
|                           |          | control   | 219 ± 29   | Fig. 5t |
|                           |          | Ep400ΔPNS | 233 ± 31   | Fig. 2i |
|                           |          | Ep400ΔPNS | 211 ± 9    | Fig. 5t |
|                           |          | dko       | 219 ± 7    | Fig. 5t |
|                           | P9       | control   | 20 ± 1     | Fig. 2i |
|                           |          | control   | 18 ± 2     | Fig. 5t |
|                           |          | Ep400ΔPNS | 40 ± 4     | Fig. 2i |
|                           |          | Ep400ΔPNS | 44 ± 2     | Fig. 5t |
|                           |          | dko       | 25 ± 2     | Fig. 5t |
|                           | P15      | control   | 7 ± 1      | Fig. 2i |
|                           |          | Ep400ΔPNS | 16 ± 3     | Fig. 2i |
|                           | P21      | control   | 0 ± 0      | Fig. 2i |
|                           |          | control   | 0 ± 0      | Fig. 5t |
|                           |          | Ep400ΔPNS | 23 ± 2     | Fig. 2i |
|                           |          | Ep400ΔPNS | 16 ± 3     | Fig. 5t |
|                           |          | dko       | 2 ± 2      | Fig. 5t |
|                           | 2 months | control   | 0 ± 0      | Fig. 2i |

|           |           |           |                |                |
|-----------|-----------|-----------|----------------|----------------|
|           |           | control   | 9 ± 1          | Fig. 5t        |
|           |           | Ep400ΔPNS | 0 ± 0          | Fig. 2i        |
|           |           | Ep400ΔPNS | 14 ± 2         | Fig. 5t        |
|           |           | dko       | 11 ± 3         | Fig. 5t        |
| TUNEL     | P0        | control   | 136 ± 8        | Fig. 2j        |
|           |           | Ep400ΔPNS | 122 ± 11       | Fig. 2j        |
|           | P9        | control   | 41 ± 1         | Fig. 2j        |
|           |           | Ep400ΔPNS | 71 ± 4         | Fig. 2j        |
|           | P15       | control   | 15 ± 5         | Fig. 2j        |
|           |           | Ep400ΔPNS | 66 ± 10        | Fig. 2j        |
|           | P21       | control   | 8 ± 2          | Fig. 2j        |
|           |           | Ep400ΔPNS | 65 ± 6         | Fig. 2j        |
| 2 months  | control   | 3 ± 0     | Fig. 2j        |                |
|           | Ep400ΔPNS | 6 ± 2     | Fig. 2j        |                |
| Iba1      | P0        | control   | 1047 ± 58      | Fig. 2k        |
|           |           | control   | 970 ± 24       | Fig. 5u        |
|           |           | Ep400ΔPNS | 927 ± 50       | Fig. 2k        |
|           |           | Ep400ΔPNS | 991 ± 36       | Fig. 5u        |
|           |           | dko       | 978 ± 30       | Fig. 5u        |
|           | P9        | control   | 593 ± 49       | Fig. 2k        |
|           |           | control   | 460 ± 24       | Fig. 5u        |
|           |           | Ep400ΔPNS | 1077 ± 124     | Fig. 2k        |
|           |           | Ep400ΔPNS | 1015 ± 7       | Fig. 5u        |
|           |           | dko       | 770 ± 76       | Fig. 5u        |
|           | P15       | control   | 260 ± 70       | Fig. 2k        |
|           |           | Ep400ΔPNS | 1220 ± 105     | Fig. 2k        |
|           | P21       | control   | 103 ± 35       | Fig. 2k        |
|           |           | control   | 27 ± 6         | Fig. 5u        |
|           |           | Ep400ΔPNS | 617 ± 34       | Fig. 2k        |
|           |           | Ep400ΔPNS | 337 ± 55       | Fig. 5u        |
|           |           | dko       | 161 ± 20       | Fig. 5u        |
|           | 2 months  | control   | 120 ± 17       | Fig. 2k        |
|           |           | control   | 131 ± 4        | Fig. 5u        |
|           |           | Ep400ΔPNS | 340 ± 72       | Fig. 2k        |
| Ep400ΔPNS |           | 340 ± 19  | Fig. 5u        |                |
| dko       |           | 332 ± 10  | Fig. 5u        |                |
| Ki67      | P0        | control   | 2027 ± 127     | Suppl. Fig. 5f |
|           |           | Ep400ΔPNS | 2163 ± 253     | Suppl. Fig. 5f |
|           | P9        | control   | 357 ± 69       | Suppl. Fig. 5f |
|           |           | Ep400ΔPNS | 963 ± 171      | Suppl. Fig. 5f |
|           | P15       | control   | 37 ± 9         | Suppl. Fig. 5f |
| Ep400ΔPNS |           | 503 ± 70  | Suppl. Fig. 5f |                |

|                   |          |           |          |                |
|-------------------|----------|-----------|----------|----------------|
|                   | P21      | control   | 17 ± 7   | Suppl. Fig. 5f |
|                   |          | Ep400ΔPNS | 333 ± 62 | Suppl. Fig. 5f |
|                   | 2 months | control   | 13 ± 3   | Suppl. Fig. 5f |
|                   |          | Ep400ΔPNS | 77 ± 23  | Suppl. Fig. 5f |
| Cleaved caspase 3 | P0       | control   | 507 ± 72 | Suppl. Fig. 5h |
|                   |          | Ep400ΔPNS | 537 ± 90 | Suppl. Fig. 5h |
|                   | P9       | control   | 19 ± 3   | Suppl. Fig. 5h |
|                   |          | Ep400ΔPNS | 90 ± 7   | Suppl. Fig. 5h |
|                   | P15      | control   | 24 ± 2   | Suppl. Fig. 5h |
|                   |          | Ep400ΔPNS | 127 ± 14 | Suppl. Fig. 5h |
|                   | P21      | control   | 18 ± 1   | Suppl. Fig. 5h |
|                   |          | Ep400ΔPNS | 82 ± 3   | Suppl. Fig. 5h |
|                   | 2 months | control   | 11 ± 2   | Suppl. Fig. 5h |
|                   |          | Ep400ΔPNS | 16 ± 2   | Suppl. Fig. 5h |

**Supplementary Table 6:** Determination of transcript levels in sciatic nerves of Ep400ΔPNS mice relative to control

| Gene   | Primer                                                       | Age      | Mean value<br>± SEM | Figure  |
|--------|--------------------------------------------------------------|----------|---------------------|---------|
| Ep400  | 5'-GCAGATGCAGACATCTCAGC-3'<br>5'-GTTGGTAGCAGAAGAGGGTC-3'     | P9       | 0.57 ± 0.04         | Fig. 2l |
|        |                                                              | P21      | 0.47 ± 0.08         | Fig. 2l |
|        |                                                              | 2 months | 0.57 ± 0.06         | Fig. 2l |
| ErbB3  | 5'-TGTGGACAGCAAAACCTCAG-3'<br>5'-CCATCCTGGGCTACACAGTT-3'     | P9       | 1.00 ± 0.09         | Fig. 2l |
|        |                                                              | P21      | 1.08 ± 0.13         | Fig. 2l |
|        |                                                              | 2 months | 1.66 ± 0.25         | Fig. 2l |
| S100b  | 5'- GACTCCAGCAGCAAAGGTGAC- 3'<br>5'-CATCTTCGTCCAGCGTCTCCA-3' | P9       | 0.62 ± 0.16         | Fig. 2l |
|        |                                                              | P21      | 0.31 ± 0.11         | Fig. 2l |
|        |                                                              | 2 months | 0.66 ± 0.15         | Fig. 2l |
| Fabp7  | 5'-TTTGTCTTCGGTGTGGAGGT-3'<br>5'-TGGTTTGCATTCCAAAGAAAG-3'    | P9       | 0.45 ± 0.16         | Fig. 2l |
|        |                                                              | P21      | 0.67 ± 0.33         | Fig. 2l |
|        |                                                              | 2 months | 0.87 ± 0.15         | Fig. 2l |
| Cdh19  | 5'-GGGAGAATTTCTCCTCTGG-3'<br>5'-CGGAAAATTTCTCAATGACCA-3'     | P9       | 1.24 ± 0.12         | Fig. 2l |
|        |                                                              | P21      | 0.83 ± 0.29         | Fig. 2l |
|        |                                                              | 2 months | 1.67 ± 0.15         | Fig. 2l |
| L1Cam  | 5'-CTCCTCCATTGCTATTCCA-3'<br>5'-AGCCAGTGCCTGTAGGAAGA-3'      | P9       | 0.72 ± 0.12         | Fig. 2l |
|        |                                                              | P21      | 0.89 ± 0.28         | Fig. 2l |
|        |                                                              | 2 months | 1.39 ± 0.18         | Fig. 2l |
| Dhh    | 5'-CTTGGACATCACCACGTCTG-3'<br>5'-GTAGTTCCTCAGCCCCTTC-3'      | P9       | 1.65 ± 0.27         | Fig. 2l |
|        |                                                              | P21      | 2.33 ± 0.09         | Fig. 2l |
|        |                                                              | 2 months | 5.07 ± 0.48         | Fig. 2l |
| Nfasc  | 5'-GACAGCCTGGTGGACTATGG-3'<br>5'-TCTGCAGTTGCTTCATCTCC-3'     | P9       | 0.15 ± 0.05         | Fig. 2l |
|        |                                                              | P21      | 0.19 ± 0.05         | Fig. 2l |
|        |                                                              | 2 months | 0.37 ± 0.15         | Fig. 2l |
| Ank2   | 5'-GCTTCAGGGGTGGTGTCTA-3'<br>5'-TACAGTGCAGTGGCCAGAAG-3'      | P9       | 0.62 ± 0.14         | Fig. 2l |
|        |                                                              | P21      | 0.50 ± 0.16         | Fig. 2l |
|        |                                                              | 2 months | 0.37 ± 0.03         | Fig. 2l |
| Sox10  | 5'-ACAGCAGCAGGAAGGCTTCT-3'<br>5'-TGTCCTCAGTGCGTCCTTAG-3'     | P9       | 0.86 ± 0.03         | Fig. 2m |
|        |                                                              | P21      | 0.56 ± 0.20         | Fig. 2m |
|        |                                                              | 2 months | 1.21 ± 0.21         | Fig. 2m |
| Oct6   | 5'-GTTCTCGCAGACCACCATCT-3'<br>5'-GGCTTGGGACACTTGAGAAA-3'     | P9       | 0.67 ± 0.11         | Fig. 2m |
|        |                                                              | P21      | 1.49 ± 0.32         | Fig. 2m |
|        |                                                              | 2 months | 3.83 ± 0.36         | Fig. 2m |
| Krox20 | 5'-AGGCCCTTTGACCAGATGA-3'<br>5'-AAGATGCCCGCACTACAAT-3'       | P9       | 0.45 ± 0.05         | Fig. 2m |
|        |                                                              | P21      | 0.23 ± 0.03         | Fig. 2m |
|        |                                                              | 2 months | 0.41 ± 0.08         | Fig. 2m |
| Cx32   | 5'-CTGCTCTACCCCGGCTATGC-3'                                   | P9       | 0.19 ± 0.03         | Fig. 2m |

|          |                                                          |          |               |         |
|----------|----------------------------------------------------------|----------|---------------|---------|
|          | 5'-CAGGCTGAGCATCGGTCGCTCTT-3'                            | P21      | 0.20 ± 0.01   | Fig. 2m |
|          |                                                          | 2 months | 0.71 ± 0.14   | Fig. 2m |
| Mbp      | 5'-CACACACGAGAACTACCCA-3'<br>5'-CCAAGTTCACCCCTACTCCA-3'  | P9       | 0.24 ± 0.04   | Fig. 2m |
|          |                                                          | P21      | 0.14 ± 0.01   | Fig. 2m |
|          |                                                          | 2 months | 0.24 ± 0.01   | Fig. 2m |
| Mpz      | 5'-CTGGTCCAGTGAATGGGTCT-3'<br>5'-CATGTGAAAGTGCCGTTGTC-3' | P9       | 0.25 ± 0.07   | Fig. 2m |
|          |                                                          | P21      | 0.10 ± 0.03   | Fig. 2m |
|          |                                                          | 2 months | 0.36 ± 0.04   | Fig. 2m |
| Pmp22    | 5'-CTCAAAGCCTTCGTCAGTCC-3'<br>5'-TTGGTGGCCAATACAAGTCA-3' | P9       | 0.28 ± 0.07   | Fig. 2m |
|          |                                                          | P21      | 0.16 ± 0.03   | Fig. 2m |
|          |                                                          | 2 months | 0.36 ± 0.06   | Fig. 2m |
| Periaxin | 5'-TAGTGGGTGAGGGCATCTTC-3'<br>5'-TGGTGACGTGAGTTCCACAT-3' | P9       | 0.36 ± 0.11   | Fig. 2m |
|          |                                                          | P21      | 0.25 ± 0.10   | Fig. 2m |
|          |                                                          | 2 months | 0.65 ± 0.14   | Fig. 2m |
| Tfap2a   | 5'-GCTCCACCTCGAAGTACAAG-3'<br>5'-CCTGCTGGCAGATTCAATCC-3' | P9       | 18.36 ± 2.43  | Fig. 4i |
|          |                                                          | P21      | 65.82 ± 13.73 | Fig. 4i |
|          |                                                          | 2 months | 153.9 ± 11.66 | Fig. 4i |
| Pou3f3   | 5'-TCCAGAACAGGCTAGGGTTG-3'<br>5'-GGTGGGCATATTTTCACTGG-3' | P9       | 57.42 ± 18.64 | Fig. 4i |
|          |                                                          | P21      | 1.40 ± 0.09   | Fig. 4i |
|          |                                                          | 2 months | 3.30 ± 0.54   | Fig. 4i |
| Pax3     | 5'-GGGAACTGGAGGCATGTTTA-3'<br>5'-GTTTTCCGTCCCAGCAATTA-3' | P9       | 44.64 ± 12.09 | Fig. 4i |
|          |                                                          | P21      | 4.36 ± 0.72   | Fig. 4i |
|          |                                                          | 2 months | 6.58 ± 1.10   | Fig. 4i |
| Sox1     | 5'-GAGGATGGGTTGTGCTCAGT-3'<br>5'-TGGGATAAGACCTGGGTGAG-3' | P9       | 61.88 ± 8.68  | Fig. 4i |
|          |                                                          | P21      | 2.26 ± 0.31   | Fig. 4i |
|          |                                                          | 2 months | 7.49 ± 1.28   | Fig. 4i |
| Sox2     | 5'-CACAACCTCGGAGATCAGCAA-3'<br>5'-CTCCGGAAGCGTGTACTTA3'  | P9       | 1.30 ± 0.03   | Fig. 4i |
|          |                                                          | P21      | 1.42 ± 0.05   | Fig. 4i |
|          |                                                          | 2 months | 2.55 ± 0.22   | Fig. 4i |
| Sox3     | 5'-CGTAACTGTCGGGGTTTTGT-3'<br>5'-AACCTAGGAATCCGGGAAGA-3' | P9       | 2.33 ± 0.26   | Fig. 4i |
|          |                                                          | P21      | 2.67 ± 0.29   | Fig. 4i |
|          |                                                          | 2 months | 8.88 ± 0.56   | Fig. 4i |

**Supplementary Table 7: Percentage of Krox20-positive SCs that express Sox2**

| Marker        | Age | Genotype  | Mean value<br>± SEM | Figure  |
|---------------|-----|-----------|---------------------|---------|
| Sox2 + Krox20 | P21 | control   | 0.28 ± 0.28         | Fig. 4h |
|               |     | Ep400ΔPNS | 5.68 ± 0.68         | Fig. 4h |

**Supplementary Table 8:** Effect of transcription factors on SC-specific regulatory regions in luciferase reporter gene assays

| Reporter       | Effector        | Mean value<br>± SEM | Figure  |
|----------------|-----------------|---------------------|---------|
| Krox20 MSE-luc | -               | 1.00 ± 0.00         | Fig. 4k |
|                | Sox10           | 45.17 ± 0.80        | Fig. 4k |
|                | Sox10 + Pax3    | 1.26 ± 0.15         | Fig. 4k |
|                | Sox10 + Sox2    | 11.42 ± 2.67        | Fig. 4k |
|                | Sox10 + Sox3    | 4.75 ± 1.21         | Fig. 4k |
|                | Sox10 + Tfap2a  | 9.84 ± 3.94         | Fig. 4k |
| Pmp22-luc      | -               | 1.00 ± 0.00         | Fig. 4l |
|                | Krox20          | 19.67 ± 1.59        | Fig. 4l |
|                | Krox20 + Pax3   | 3.77 ± 0.20         | Fig. 4l |
|                | Krox20 + Sox2   | 23.67 ± 1.90        | Fig. 4l |
|                | Krox20 + Sox3   | 4.47 ± 0.35         | Fig. 4l |
|                | Krox20 + Tfap2a | 26.17 ± 1.93        | Fig. 4l |
| Periaxin-luc   | -               | 1.00 ± 0.00         | Fig. 4m |
|                | Krox20          | 66.17 ± 10.88       | Fig. 4m |
|                | Krox20 + Pax3   | 10.93 ± 2.11        | Fig. 4m |
| Mag-luc        | -               | 1.00 ± 0.00         | Fig. 4m |
|                | Krox20          | 27.20 ± 2.43        | Fig. 4m |
|                | Krox20 + Pax3   | 7.37 ± 1.52         | Fig. 4m |
| Connexin32-luc | -               | 1.00 ± 0.00         | Fig. 4m |
|                | Krox20          | 8.20 ± 0.46         | Fig. 4m |
|                | Krox20 + Pax3   | 4.77 ± 0.35         | Fig. 4m |
| Mpz-luc        | -               | 1.00 ± 0.00         | Fig. 4m |
|                | Krox20          | 10.27 ± 1.13        | Fig. 4m |
|                | Krox20 + Pax3   | 2.73 ± 0.09         | Fig. 4m |

**Supplementary Table 9:** Quantification of myelin debris, myelin outfoldings and Remak bundles in sciatic nerves of control and mutant mice

| Structure          | Age      | Genotype  | Mean value<br>± SEM | Figure                |
|--------------------|----------|-----------|---------------------|-----------------------|
| Myelin debris      | P21      | control   | 13 ± 7              | Fig.5o, Suppl. Fig.3s |
|                    |          | Ep400ΔPNS | 434 ± 26            | Fig.5o, Suppl. Fig.3s |
|                    |          | dko       | 220 ± 31            | Fig.5o                |
|                    | 2 months | control   | 4 ± 4               | Suppl. Fig.3t         |
|                    |          | Ep400ΔPNS | 301 ± 38            | Suppl. Fig.3t         |
| Myelin outfoldings | P21      | control   | 52 ± 43             | Fig.5p, Suppl. Fig.3u |
|                    |          | Ep400ΔPNS | 656 ± 52            | Fig.5p, Suppl. Fig.3u |
|                    |          | dko       | 324 ± 86            | Fig.5p                |
|                    | 2 months | control   | 42 ± 15             | Suppl. Fig.3v         |
|                    |          | Ep400ΔPNS | 1445 ± 92           | Suppl. Fig.3v         |
| Remak bundles      | P21      | control   | 889 ± 2             | Suppl. Figs.3w & 8g   |
|                    |          | Ep400ΔPNS | 697 ± 9             | Suppl. Figs.3w & 8g   |
|                    |          | dko       | 738 ± 19            | Suppl. Fig.8g         |
|                    | 2 months | control   | 828 ± 50            | Suppl. Figs.3x        |
|                    |          | Ep400ΔPNS | 645 ± 32            | Suppl. Figs.3x        |



**Supplementary Table 10:** Number of Ep400-positive SCs in control and mutant mice

| Age   | Genotype  | Mean value<br>± SEM | Figure         |
|-------|-----------|---------------------|----------------|
| E12.5 | control   | 95.1 ± 0.4          | Suppl. Fig.2a  |
|       | Ep400ΔNC  | 5.7 ± 0.6           | Suppl. Fig.2a  |
| E14.5 | control   | 93.4 ± 1.1          | Suppl. Fig.2a  |
|       | Ep400ΔNC  | 5.8 ± 1.0           | Suppl. Fig.2a  |
| P0    | control   | 99.3 ± 0.2          | Suppl. Fig. 3a |
|       | Ep400ΔPNS | 1.7 ± 0.5           | Suppl. Fig. 3a |
| P21   | control   | 99.8 ± 0.2          | Suppl. Fig. 3a |
|       | Ep400ΔPNS | 6.3 ± 1.7           | Suppl. Fig. 3a |

**Supplementary Table 11:** Relative number of cycling, proliferating and just differentiating SCs in control and mutant mice

| Feature      | Genotype  | Mean value<br>± SEM | Figure        |
|--------------|-----------|---------------------|---------------|
| Ki67+        | control   | 0.44 ± 0.04         | Suppl. Fig.5a |
|              | Ep400ΔNC  | 0.40 ± 0.04         | Suppl. Fig.5a |
| Ki67+, BrdU+ | control   | 0.15 ± 0.02         | Suppl. Fig.5b |
|              | Ep400ΔNC  | 0.14 ± 0.05         | Suppl. Fig.5b |
| Ki67+, BrdU- | control   | 0.33 ± 0.05         | Suppl. Fig.5c |
|              | Ep400ΔPNS | 0.24 ± 0.01         | Suppl. Fig.5c |
| Ki67-, EdU+  | control   | 0.51 ± 0.03         | Suppl. Fig.5d |
|              | Ep400ΔPNS | 0.54 ± 0.05         | Suppl. Fig.5d |

**Supplementary Table 12:** Primers used to amplify specific regions from the mouse *Tfap2a* and *Pax3* genomic loci

| Gene   | Region | Position (mm10)            | Primer                      |
|--------|--------|----------------------------|-----------------------------|
| Tfap2a | 1      | chr13, 40739401 - 40739420 | 5'-ACGATAGTAGCGCCAGGAGA-3'  |
|        |        | chr13, 40739315 - 40739334 | 5'-AGTTGCGGCAGTCACTTTCT-3'  |
|        | 2      | chr13, 40735201 - 40735220 | 5'-AGTGGGAAAACCTCAGCCAGA-3' |
|        |        | chr13, 40735103 - 40735122 | 5'-GGACCCTTCCTCCCTTACTG-3'  |
|        | 3      | chr13, 40732357 - 40732376 | 5'-GCCTTTCTCCTCTCCGTCTT-3'  |
|        |        | chr13, 40732231 - 40732250 | 5'-TCTGGTCCTACATGGGGTTC-3'  |
|        | 4      | chr13, 40731944 - 40731963 | 5'-CATGAGAGAGGGGTTGAGAGA-3' |
|        |        | chr13, 40731856 - 40731875 | 5'-GCTATCCCGCTGATACCAAA-3'  |
|        | 5      | chr13, 40731514 - 40731532 | 5'-ACCAACCGAGATCGGAGAA-3'   |
|        |        | chr13, 40731434 - 40731453 | 5'-GCTTCGCTAACCCCTGTCCT-3'  |
|        | 6      | chr13, 40730811 - 40730830 | 5'-GTCGCTCGCTTTTTGTCTCT-3'  |
|        |        | chr13, 40730689 - 40730708 | 5'-AGGGAAGAATGCCTGGAAAT-3'  |
|        | 7      | chr13, 40730407 - 40730426 | 5'-TTGTTGTTGGTGGTGTGGTT-3'  |
|        |        | chr13, 40730295 - 40730314 | 5'-CCGAACCTTGTACCACCGAGT-3' |
|        | 8      | chr13, 40729453 - 40729472 | 5'-GGTGCGGCAGAATCTTTCTA-3'  |
|        |        | chr13, 40729365 - 40729384 | 5'-CGCTTCCTCTGTTTGTAGGC-3'  |
|        | 9      | chr13, 40726704 - 40726723 | 5'-CAGGAAGCCTTGTGCTCTTC-3'  |
|        |        | chr13, 40726609 - 40726628 | 5'-CTGTGGCAGCAATGAGAAAA-3'  |
|        | 10     | chr13, 40724516 - 40724535 | 5'-TGCATGGGTTTATCATCTGC-3'  |
|        |        | chr13, 40724432 - 40724451 | 5'-CCTGAAGTACCTGCCACCAT-3'  |
| Pax3   | 1      | chr1, 78200684 - 78200703  | 5'-AGATCCGCATCTTGCTCCTA-3'  |
|        |        | chr1, 78200595 - 78200614  | 5'-CCACACCTCCGCAGTTATTT-3'  |
|        | 2      | chr1, 78199415 - 78199434  | 5'-CTCTCAGTGCCCTCAGAACC-3'  |
|        |        | chr1, 78199287 - 78199306  | 5'-TACTCAGAGGCAGCCAGGAT-3'  |
|        | 3      | chr1, 78197497 - 78197516  | 5'-GAGGAAATAAGGGCGGATA-3'   |
|        |        | chr1, 78197399 - 78197418  | 5'-GGTGTCCCTGTCCCTTACA-3'   |
|        | 4      | chr1, 78197229 - 78197248  | 5'-GTAGCTTCTGTGCCCCAATC-3'  |
|        |        | chr1, 78197121 - 78197140  | 5'-ATCCGGACTAGGGAGCATTT-3'  |
|        | 5      | chr1, 78196977 - 78196996  | 5'-TCTGCTAGACTCGCACCAA-3'   |
|        |        | chr1, 78196900 - 78196919  | 5'-GGGGCGCTAATAGATCCAAG-3'  |
|        | 6      | chr1, 78196541 - 78196560  | 5'-TCCCGTGGTACTTCTCAACC-3'  |
|        |        | chr1, 78196455 - 78196474  | 5'-GAGCTTAGCACTCCGTTTGC-3'  |
|        | 7      | chr1, 78196120 - 78196139  | 5'-TCGTTTGCTTAAAGGTGCT-3'   |
|        |        | chr1, 78196038 - 78196057  | 5'-AACCCAGTCTCCTGCTTTT-3'   |
|        | 8      | chr1, 78194974 - 78194993  | 5'-GATTTTAATGCCTGGGAGCA-3'  |
|        |        | chr1, 78194906 - 78194925  | 5'-CAGTGCAGTGAGTGGGAAGA-3'  |
|        | 9      | chr1, 78194172 - 78194191  | 5'-GTTTCGTTTTTGTGCGGATT-3'  |
|        |        | chr1, 78194076 - 78194095  | 5'-GATGCTCGGGAACCAAATTA-3'  |

**Supplementary Table 13:** H2A.Z and H3K27ac occupancy at specific *Tfap2a* and *Pax3* genomic regions in sciatic nerves of control and Ep400ΔPNS mice

| Gene & Region   | Age | Histone | Enrichment in control (mean ± SEM) | Enrichment in Ep400ΔPNS (mean ± SEM) | Figure         |
|-----------------|-----|---------|------------------------------------|--------------------------------------|----------------|
| <i>Tfap2a</i> 1 | P9  | H2A.Z   | 1.06 ± 0.08                        | 0.96 ± 0.29                          | Suppl. Fig. 7e |
| 2               |     | H2A.Z   | 1.00 ± 0.07                        | 0.64 ± 0.22                          | Suppl. Fig. 7e |
| 3               |     | H2A.Z   | 0.86 ± 0.05                        | 1.11 ± 0.44                          | Suppl. Fig. 7e |
| 4               |     | H2A.Z   | 0.90 ± 0.13                        | 6.73 ± 0.24                          | Suppl. Fig. 7e |
| 5               |     | H2A.Z   | 2.71 ± 0.47                        | 18.43 ± 1.12                         | Suppl. Fig. 7e |
| 6               |     | H2A.Z   | 3.65 ± 0.58                        | 4.44 ± 0.37                          | Suppl. Fig. 7e |
| 7               |     | H2A.Z   | 1.88 ± 0.43                        | 5.45 ± 1.22                          | Suppl. Fig. 7e |
| 8               |     | H2A.Z   | 1.02 ± 0.04                        | 3.69 ± 0.71                          | Suppl. Fig. 7e |
| 9               |     | H2A.Z   | 1.11 ± 0.27                        | 1.03 ± 0.13                          | Suppl. Fig. 7e |
| 10              |     | H2A.Z   | 0.95 ± 0.11                        | 1.12 ± 0.01                          | Suppl. Fig. 7e |
| <i>Tfap2a</i> 1 |     | H3K27ac | 0.89 ± 0.21                        | 1.05 ± 0.14                          | Suppl. Fig. 7h |
| 2               |     | H3K27ac | 1.12 ± 0.09                        | 0.92 ± 0.09                          | Suppl. Fig. 7h |
| 3               |     | H3K27ac | 0.82 ± 0.17                        | 2.29 ± 0.44                          | Suppl. Fig. 7h |
| 4               |     | H3K27ac | 1.12 ± 0.15                        | 8.31 ± 2.51                          | Suppl. Fig. 7h |
| 5               |     | H3K27ac | 0.78 ± 0.11                        | 29.21 ± 1.91                         | Suppl. Fig. 7h |
| 6               |     | H3K27ac | 0.93 ± 0.09                        | 3.22 ± 0.57                          | Suppl. Fig. 7h |
| 7               |     | H3K27ac | 0.93 ± 0.32                        | 5.20 ± 1.47                          | Suppl. Fig. 7h |
| 8               |     | H3K27ac | 0.70 ± 0.24                        | 0.91 ± 0.19                          | Suppl. Fig. 7h |
| 9               |     | H3K27ac | 0.86 ± 0.26                        | 0.91 ± 0.28                          | Suppl. Fig. 7h |
| 10              |     | H3K27ac | 0.92 ± 0.23                        | 1.11 ± 0.16                          | Suppl. Fig. 7h |
| <i>Pax3</i> 1   |     | H2A.Z   | 1.00 ± 0.27                        | 0.92 ± 0.43                          | Suppl. Fig. 7l |
| 2               |     | H2A.Z   | 1.05 ± 0.23                        | 0.84 ± 0.42                          | Suppl. Fig. 7l |
| 3               |     | H2A.Z   | 1.75 ± 0.67                        | 6.79 ± 0.90                          | Suppl. Fig. 7l |
| 4               |     | H2A.Z   | 3.69 ± 0.41                        | 4.82 ± 0.55                          | Suppl. Fig. 7l |
| 5               |     | H2A.Z   | 1.04 ± 0.23                        | 5.95 ± 1.53                          | Suppl. Fig. 7l |
| 6               |     | H2A.Z   | 0.75 ± 0.06                        | 3.06 ± 0.26                          | Suppl. Fig. 7l |
| 7               |     | H2A.Z   | 1.11 ± 0.17                        | 1.08 ± 0.34                          | Suppl. Fig. 7l |
| 8               |     | H2A.Z   | 1.11 ± 0.49                        | 1.03 ± 0.12                          | Suppl. Fig. 7l |
| 9               |     | H2A.Z   | 0.91 ± 0.14                        | 1.32 ± 0.23                          | Suppl. Fig. 7l |
| <i>Pax3</i> 1   |     | H3K27ac | 0.74 ± 0.02                        | 0.65 ± 0.24                          | Suppl. Fig. 7o |
| 2               |     | H3K27ac | 0.81 ± 0.26                        | 0.76 ± 0.22                          | Suppl. Fig. 7o |
| 3               |     | H3K27ac | 0.73 ± 0.19                        | 1.57 ± 0.64                          | Suppl. Fig. 7o |
| 4               |     | H3K27ac | 1.06 ± 0.23                        | 2.83 ± 0.22                          | Suppl. Fig. 7o |
| 5               |     | H3K27ac | 0.79 ± 0.02                        | 3.81 ± 0.86                          | Suppl. Fig. 7o |
| 6               |     | H3K27ac | 0.58 ± 0.10                        | 0.74 ± 0.27                          | Suppl. Fig. 7o |
| 7               |     | H3K27ac | 0.67 ± 0.07                        | 0.84 ± 0.35                          | Suppl. Fig. 7o |

|                 |         |         |              |              |                |
|-----------------|---------|---------|--------------|--------------|----------------|
| 8               |         | H3K27ac | 0.73 ± 0.22  | 0.57 ± 0.06  | Suppl. Fig. 7o |
| 9               |         | H3K27ac | 0.79 ± 0.41  | 1.12 ± 0.32  | Suppl. Fig. 7o |
| <i>Tfap2a</i> 1 | P21     | H2A.Z   | 3.38 ± 1.04  | 4.76 ± 1.35  | Suppl. Fig. 7f |
| 2               |         | H2A.Z   | 4.70 ± 1.25  | 6.69 ± 1.55  | Suppl. Fig. 7f |
| 3               |         | H2A.Z   | 8.50 ± 2.16  | 6.25 ± 2.21  | Suppl. Fig. 7f |
| 4               |         | H2A.Z   | 5.78 ± 1.30  | 13.10 ± 0.89 | Suppl. Fig. 7f |
| 5               |         | H2A.Z   | 26.79 ± 5.21 | 14.25 ± 1.14 | Suppl. Fig. 7f |
| 6               |         | H2A.Z   | 17.03 ± 2.22 | 36.95 ± 7.36 | Suppl. Fig. 7f |
| 7               |         | H2A.Z   | 14.11 ± 5.43 | 15.22 ± 4.47 | Suppl. Fig. 7f |
| 8               |         | H2A.Z   | 3.98 ± 0.44  | 8.89 ± 2.44  | Suppl. Fig. 7f |
| 9               |         | H2A.Z   | 1.56 ± 0.71  | 2.45 ± 0.48  | Suppl. Fig. 7f |
| 10              |         | H2A.Z   | 6.31 ± 1.53  | 4.41 ± 1.19  | Suppl. Fig. 7f |
| <i>Tfap2a</i> 1 |         | H3K27ac | 1.22 ± 0.15  | 1.76 ± 0.27  | Suppl. Fig. 7i |
| 2               |         | H3K27ac | 1.81 ± 0.30  | 2.12 ± 0.55  | Suppl. Fig. 7i |
| 3               |         | H3K27ac | 2.44 ± 0.29  | 6.62 ± 0.70  | Suppl. Fig. 7i |
| 4               |         | H3K27ac | 0.86 ± 0.15  | 11.98 ± 3.04 | Suppl. Fig. 7i |
| 5               |         | H3K27ac | 3.79 ± 1.49  | 12.22 ± 0.13 | Suppl. Fig. 7i |
| 6               |         | H3K27ac | 2.44 ± 0.30  | 14.57 ± 2.93 | Suppl. Fig. 7i |
| 7               |         | H3K27ac | 2.16 ± 0.95  | 15.99 ± 3.57 | Suppl. Fig. 7i |
| 8               |         | H3K27ac | 1.42 ± 0.48  | 5.02 ± 0.34  | Suppl. Fig. 7i |
| 9               |         | H3K27ac | 0.96 ± 0.57  | 3.37 ± 0.40  | Suppl. Fig. 7i |
| 10              |         | H3K27ac | 2.67 ± 0.66  | 5.31 ± 1.59  | Suppl. Fig. 7i |
| <i>Pax3</i> 1   |         | H2A.Z   | 1.44 ± 0.28  | 2.85 ± 0.36  | Suppl. Fig. 7m |
| 2               |         | H2A.Z   | 1.96 ± 1.10  | 3.75 ± 0.89  | Suppl. Fig. 7m |
| 3               |         | H2A.Z   | 11.06 ± 2.05 | 9.44 ± 2.63  | Suppl. Fig. 7m |
| 4               |         | H2A.Z   | 11.84 ± 0.52 | 20.42 ± 4.74 | Suppl. Fig. 7m |
| 5               |         | H2A.Z   | 4.56 ± 0.71  | 29.90 ± 5.09 | Suppl. Fig. 7m |
| 6               |         | H2A.Z   | 6.82 ± 0.45  | 21.82 ± 5.75 | Suppl. Fig. 7m |
| 7               |         | H2A.Z   | 3.36 ± 1.02  | 5.59 ± 0.05  | Suppl. Fig. 7m |
| 8               |         | H2A.Z   | 1.66 ± 0.83  | 0.56 ± 0.00  | Suppl. Fig. 7m |
| 9               |         | H2A.Z   | 3.54 ± 0.48  | 3.19 ± 1.36  | Suppl. Fig. 7m |
| <i>Pax3</i> 1   |         | H3K27ac | 1.26 ± 0.47  | 1.07 ± 0.32  | Suppl. Fig. 7p |
| 2               |         | H3K27ac | 0.73 ± 0.16  | 1.69 ± 0.88  | Suppl. Fig. 7p |
| 3               |         | H3K27ac | 1.47 ± 0.09  | 1.63 ± 0.14  | Suppl. Fig. 7p |
| 4               |         | H3K27ac | 1.54 ± 0.20  | 9.64 ± 2.42  | Suppl. Fig. 7p |
| 5               |         | H3K27ac | 2.61 ± 1.62  | 6.60 ± 0.82  | Suppl. Fig. 7p |
| 6               |         | H3K27ac | 2.69 ± 0.84  | 4.66 ± 0.57  | Suppl. Fig. 7p |
| 7               |         | H3K27ac | 1.19 ± 0.04  | 2.72 ± 0.68  | Suppl. Fig. 7p |
| 8               |         | H3K27ac | 1.86 ± 0.62  | 0.28 ± 0.00  | Suppl. Fig. 7p |
| 9               |         | H3K27ac | 1.327 ± 0.33 | 3.34 ± 0.67  | Suppl. Fig. 7p |
| <i>Tfap2a</i> 1 | 2months | H2A.Z   | 1.987 ± 0.34 | 2.94 ± 0.49  | Suppl. Fig. 7g |
| 2               |         | H2A.Z   | 1.863 ± 0.45 | 1.31 ± 0.15  | Suppl. Fig. 7g |
| 3               |         | H2A.Z   | 2.377 ± 0.24 | 2.12 ± 0.36  | Suppl. Fig. 7g |

|               |    |         |               |              |                |
|---------------|----|---------|---------------|--------------|----------------|
| 4             |    | H2A.Z   | 2.570 ± 0.70  | 6.74 ± 0.54  | Suppl. Fig. 7g |
| 5             |    | H2A.Z   | 10.033 ± 2.76 | 22.18 ± 3.04 | Suppl. Fig. 7g |
| 6             |    | H2A.Z   | 8.193 ± 0.76  | 15.23 ± 2.61 | Suppl. Fig. 7g |
| 7             |    | H2A.Z   | 4.813 ± 1.15  | 6.56 ± 0.82  | Suppl. Fig. 7g |
| 8             |    | H2A.Z   | 2.163 ± 0.24  | 4.14 ± 0.16  | Suppl. Fig. 7g |
| 9             |    | H2A.Z   | 1.033 ± 0.36  | 2.31 ± 0.17  | Suppl. Fig. 7g |
| 10            |    | H2A.Z   | 1.627 ± 0.26  | 2.12 ± 0.45  | Suppl. Fig. 7g |
| <i>Tfap2a</i> | 1  | H3K27ac | 2.653 ± 0.56  | 1.52 ± 0.28  | Suppl. Fig. 7j |
|               | 2  | H3K27ac | 2.453 ± 0.84  | 2.52 ± 0.44  | Suppl. Fig. 7j |
|               | 3  | H3K27ac | 2.003 ± 0.54  | 4.19 ± 0.77  | Suppl. Fig. 7j |
|               | 4  | H3K27ac | 2.223 ± 0.44  | 16.64 ± 0.29 | Suppl. Fig. 7j |
|               | 5  | H3K27ac | 4.747 ± 1.44  | 68.71 ± 4.79 | Suppl. Fig. 7j |
|               | 6  | H3K27ac | 3.630 ± 1.05  | 12.47 ± 1.66 | Suppl. Fig. 7j |
|               | 7  | H3K27ac | 2.420 ± 0.90  | 9.91 ± 1.44  | Suppl. Fig. 7j |
|               | 8  | H3K27ac | 2.757 ± 0.23  | 3.25 ± 0.40  | Suppl. Fig. 7j |
|               | 9  | H3K27ac | 1.333 ± 0.57  | 3.01 ± 0.50  | Suppl. Fig. 7j |
|               | 10 | H3K27ac | 2.133 ± 0.79  | 1.11 ± 0.43  | Suppl. Fig. 7j |
| <i>Pax3</i>   | 1  | H2A.Z   | 1.000 ± 0.27  | 2.27 ± 0.55  | Suppl. Fig. 7n |
|               | 2  | H2A.Z   | 1.497 ± 0.21  | 3.55 ± 0.50  | Suppl. Fig. 7n |
|               | 3  | H2A.Z   | 19.180 ± 1.87 | 10.68 ± 1.94 | Suppl. Fig. 7n |
|               | 4  | H2A.Z   | 5.480 ± 1.01  | 8.27 ± 0.76  | Suppl. Fig. 7n |
|               | 5  | H2A.Z   | 2.343 ± 0.44  | 22.64 ± 3.42 | Suppl. Fig. 7n |
|               | 6  | H2A.Z   | 4.353 ± 0.36  | 10.42 ± 2.36 | Suppl. Fig. 7n |
|               | 7  | H2A.Z   | 2.717 ± 0.79  | 3.74 ± 0.39  | Suppl. Fig. 7n |
|               | 8  | H2A.Z   | 1.470 ± 0.49  | 3.48 ± 1.54  | Suppl. Fig. 7n |
|               | 9  | H2A.Z   | 2.773 ± 1.25  | 1.98 ± 0.38  | Suppl. Fig. 7n |
| <i>Pax3</i>   | 1  | H3K27ac | 1.110 ± 0.29  | 0.85 ± 0.17  | Suppl. Fig. 7q |
|               | 2  | H3K27ac | 2.203 ± 0.25  | 1.16 ± 0.01  | Suppl. Fig. 7q |
|               | 3  | H3K27ac | 2.797 ± 0.70  | 2.10 ± 0.12  | Suppl. Fig. 7q |
|               | 4  | H3K27ac | 1.867 ± 0.21  | 6.83 ± 1.47  | Suppl. Fig. 7q |
|               | 5  | H3K27ac | 0.927 ± 0.42  | 7.39 ± 0.72  | Suppl. Fig. 7q |
|               | 6  | H3K27ac | 1.757 ± 0.28  | 3.16 ± 0.35  | Suppl. Fig. 7q |
|               | 7  | H3K27ac | 1.030 ± 0.33  | 2.65 ± 0.41  | Suppl. Fig. 7q |
|               | 8  | H3K27ac | 1.950 ± 0.17  | 2.22 ± 0.26  | Suppl. Fig. 7q |
|               | 9  | H3K27ac | 1.283 ± 0.32  | 1.05 ± 0.19  | Suppl. Fig. 7q |
